# Supplementary material
Source: MDPI journal article supplement (https://www.mdpi.com/2227-9091/10/10/196)

Supplementary Materials II

for

**Spatial-Temporal Evolution and Risk Assessment of Land Finance:**

**Evidence from China**

**Table of Contents**

**Figure S1** Scatter Plots between land finance and significant risk factors in years 2009 - 2016.

**Figure S1** Scatter Plots between land finance and significant risk factors in years 2009 - 2016.

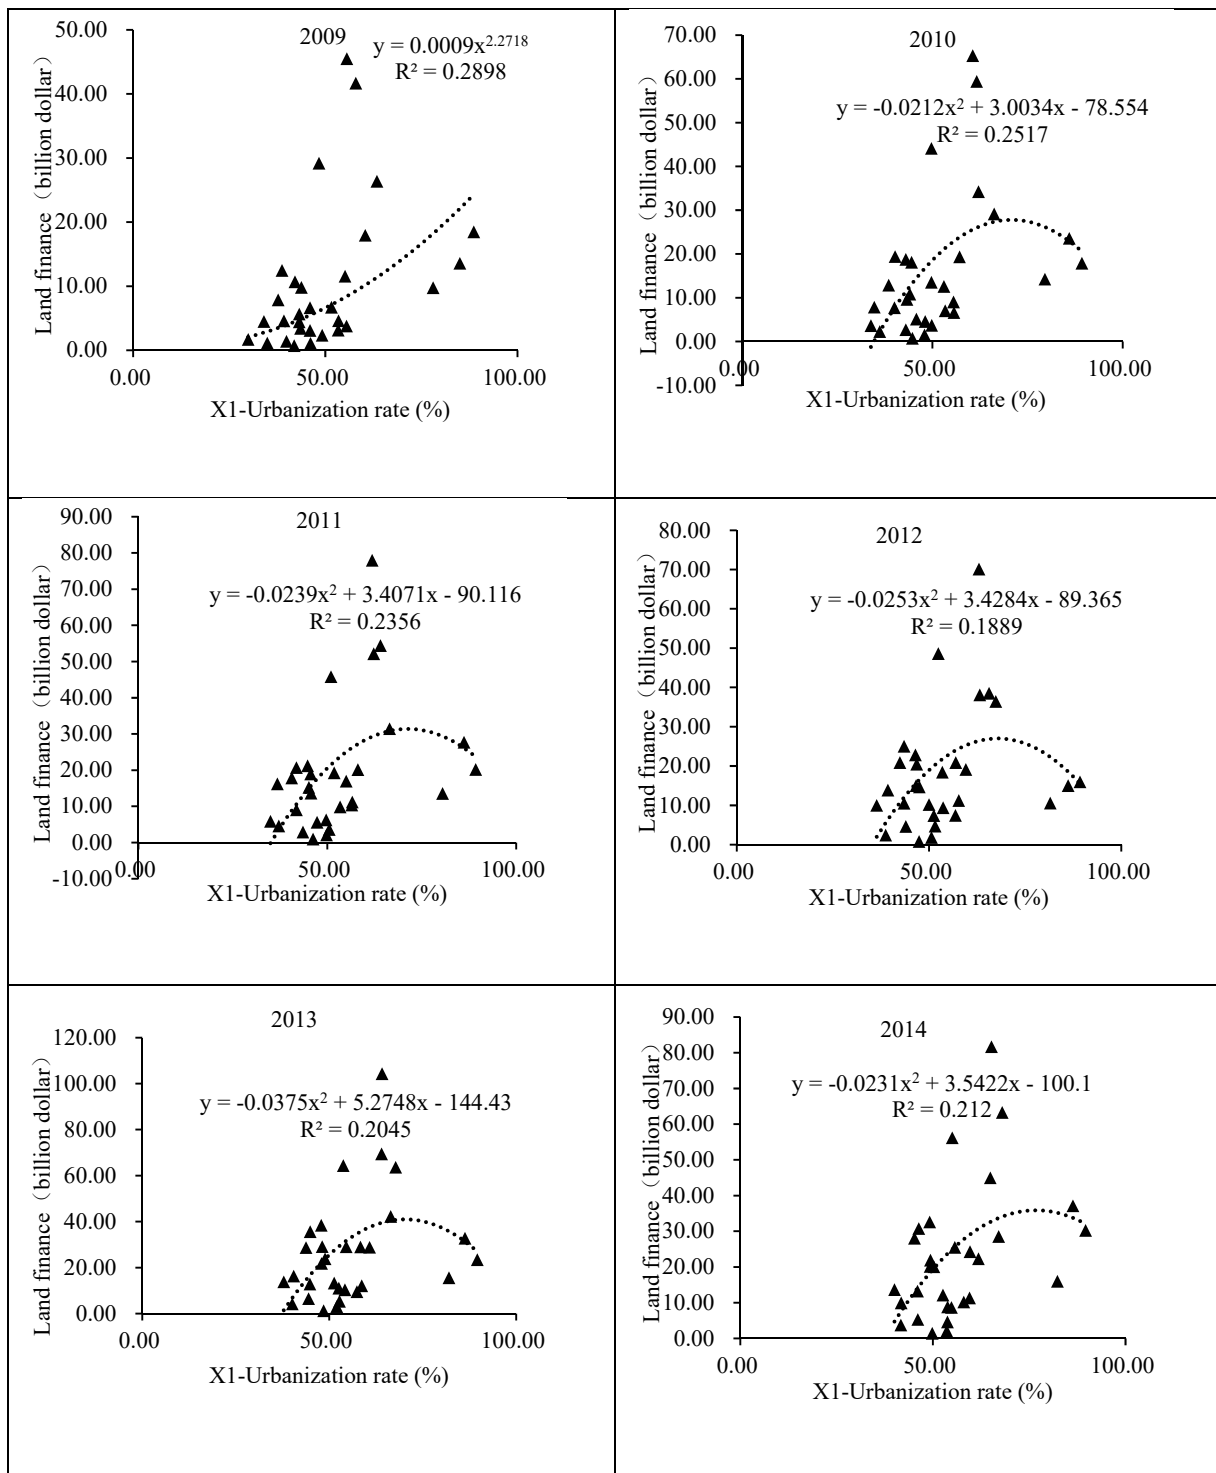

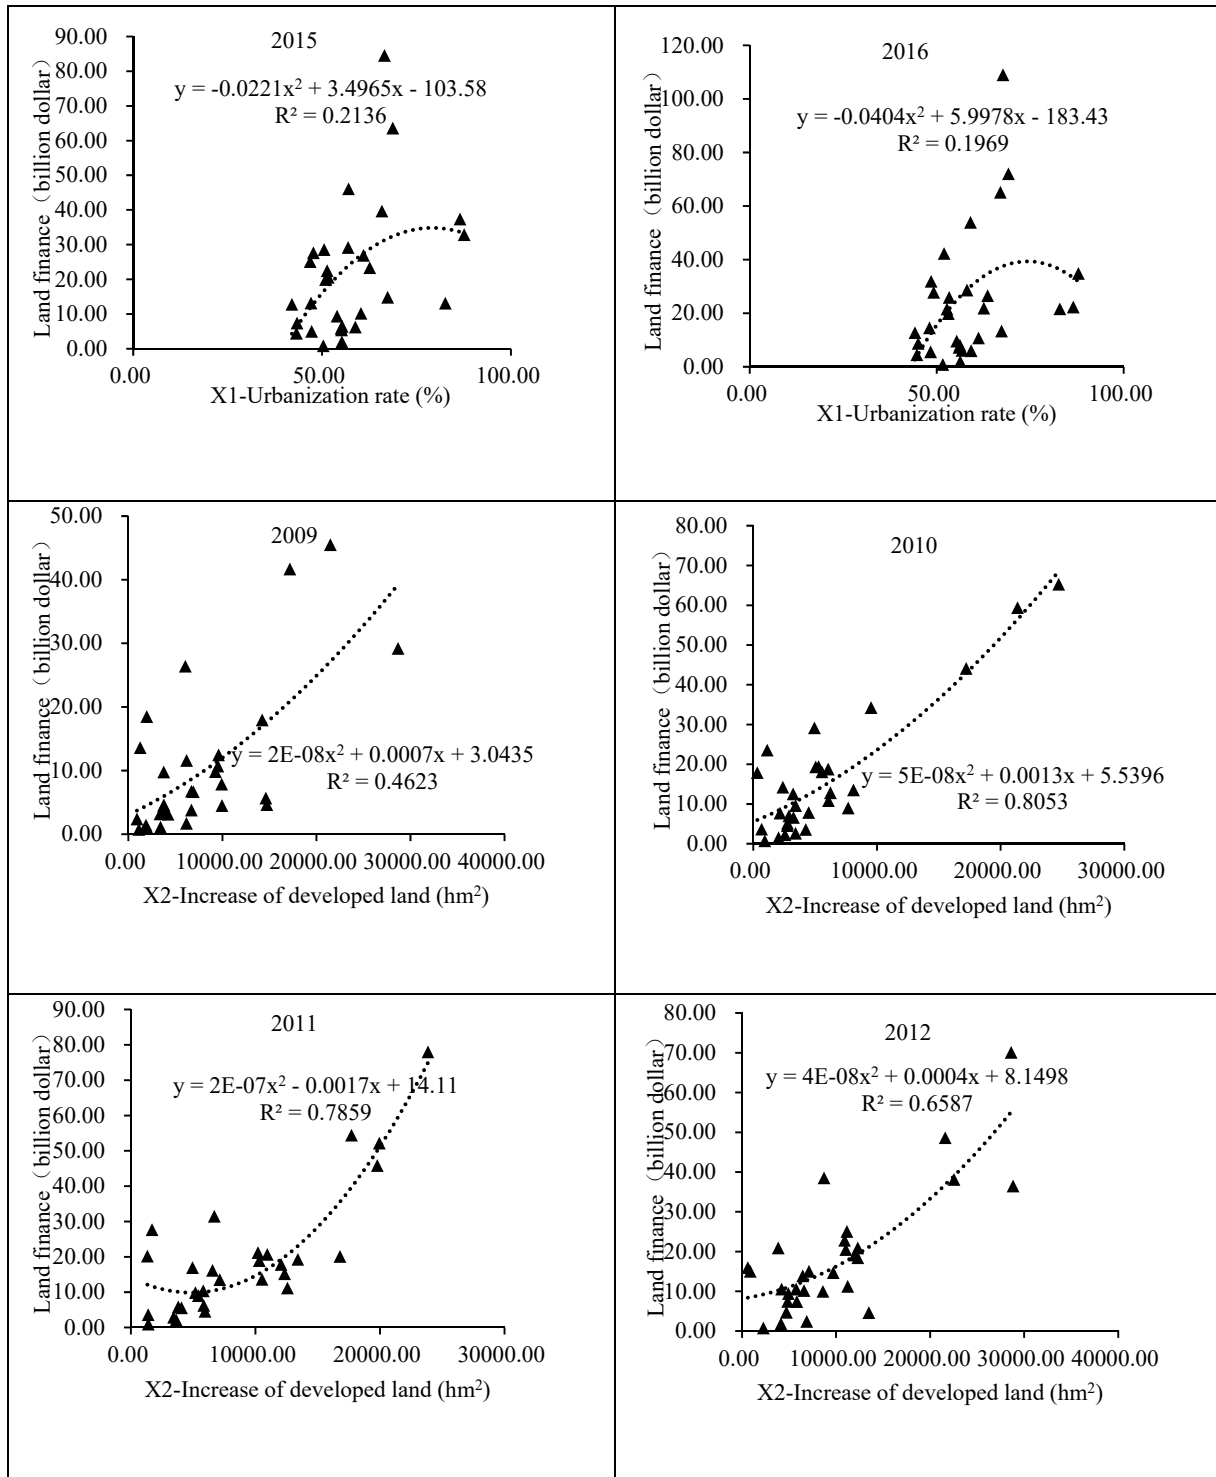

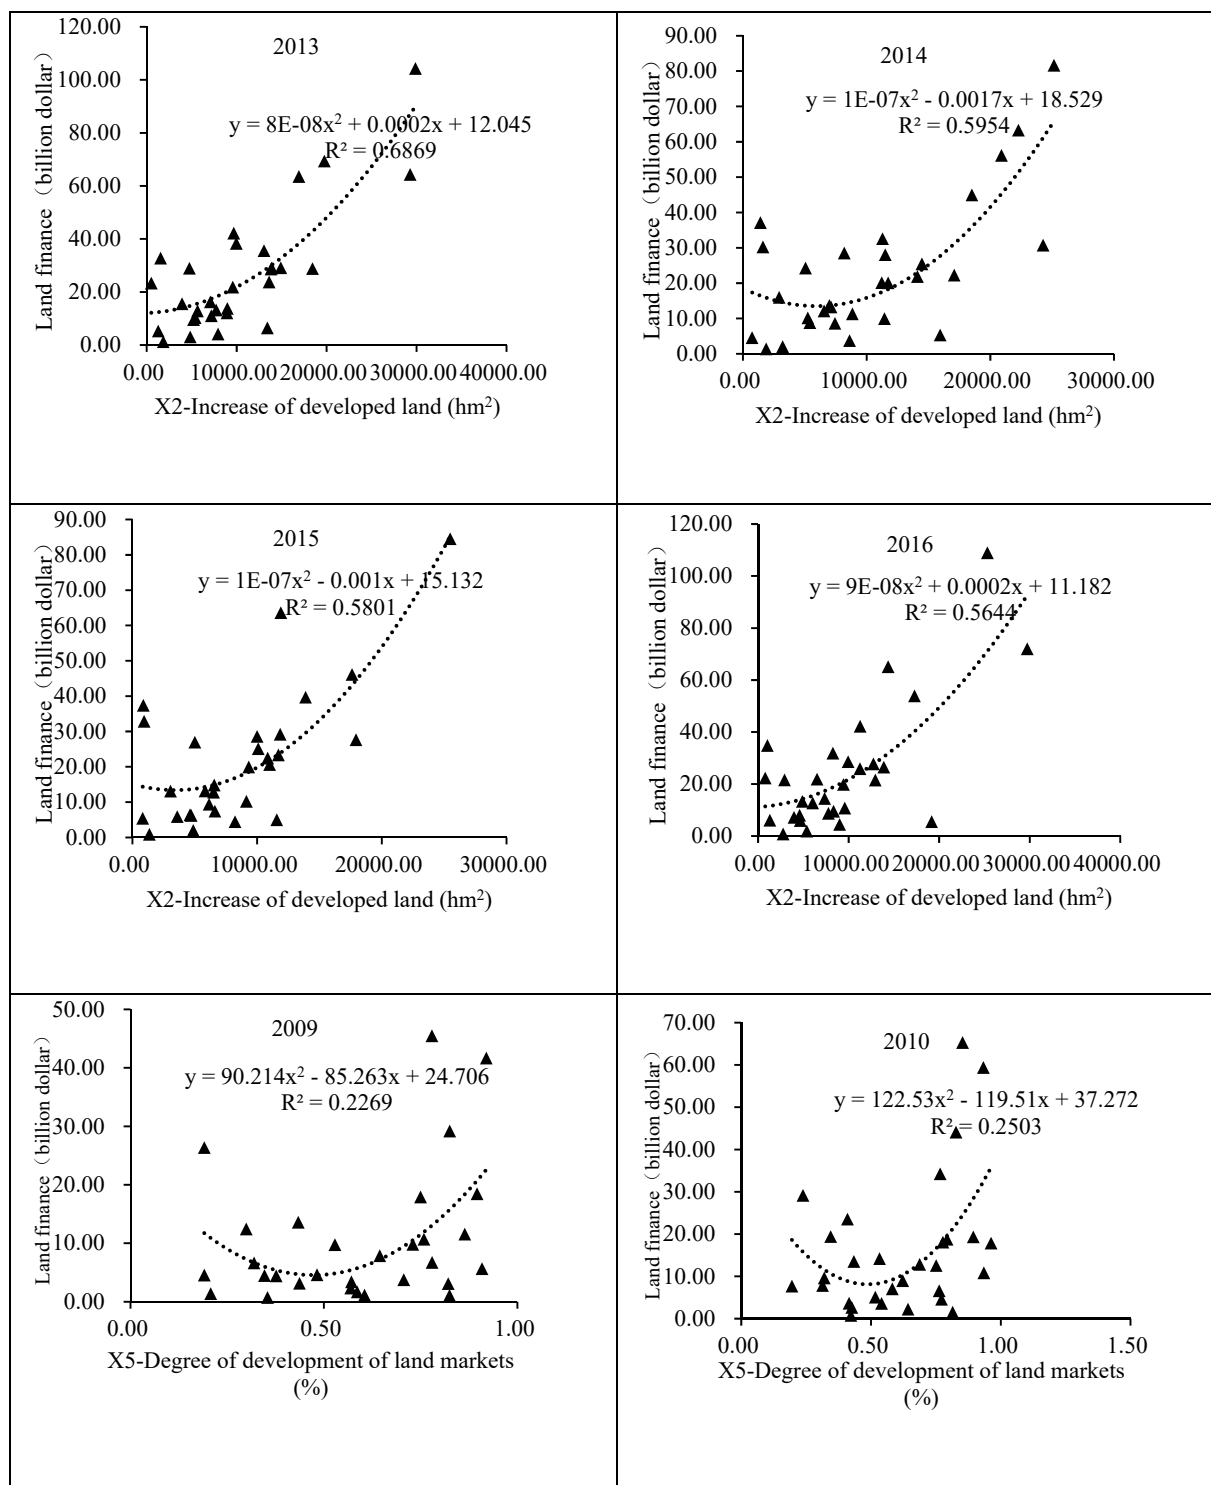

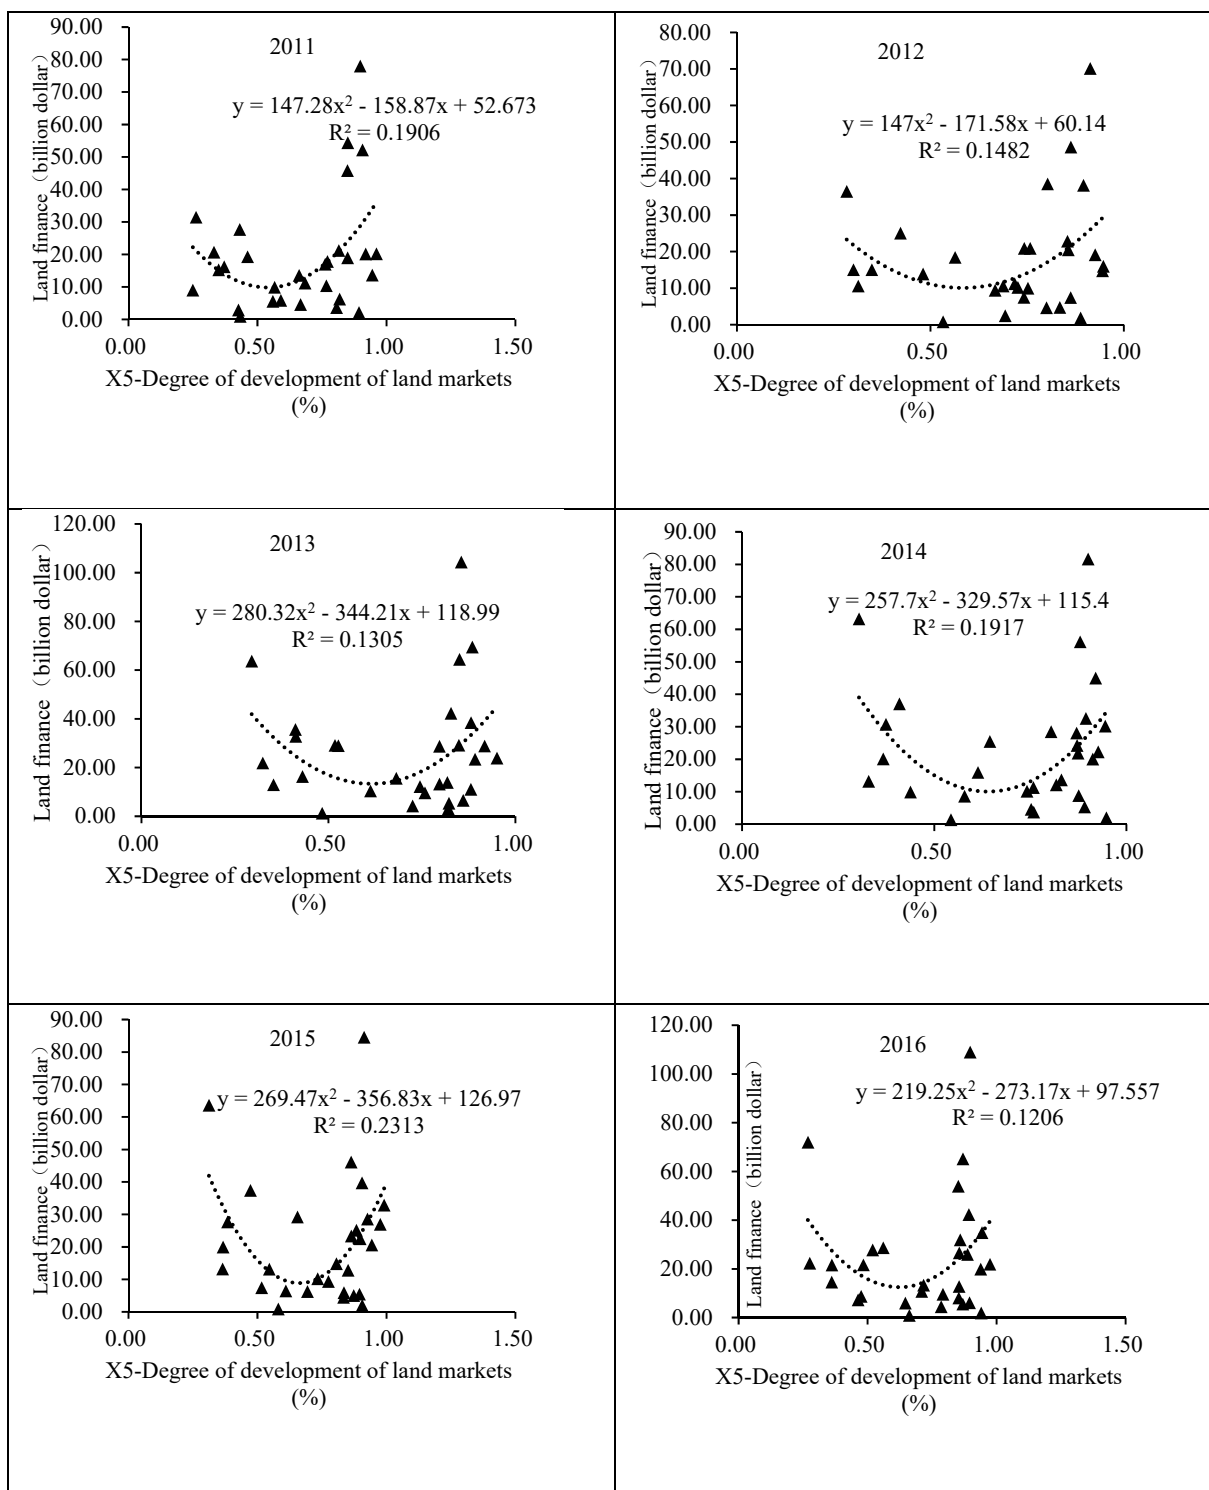

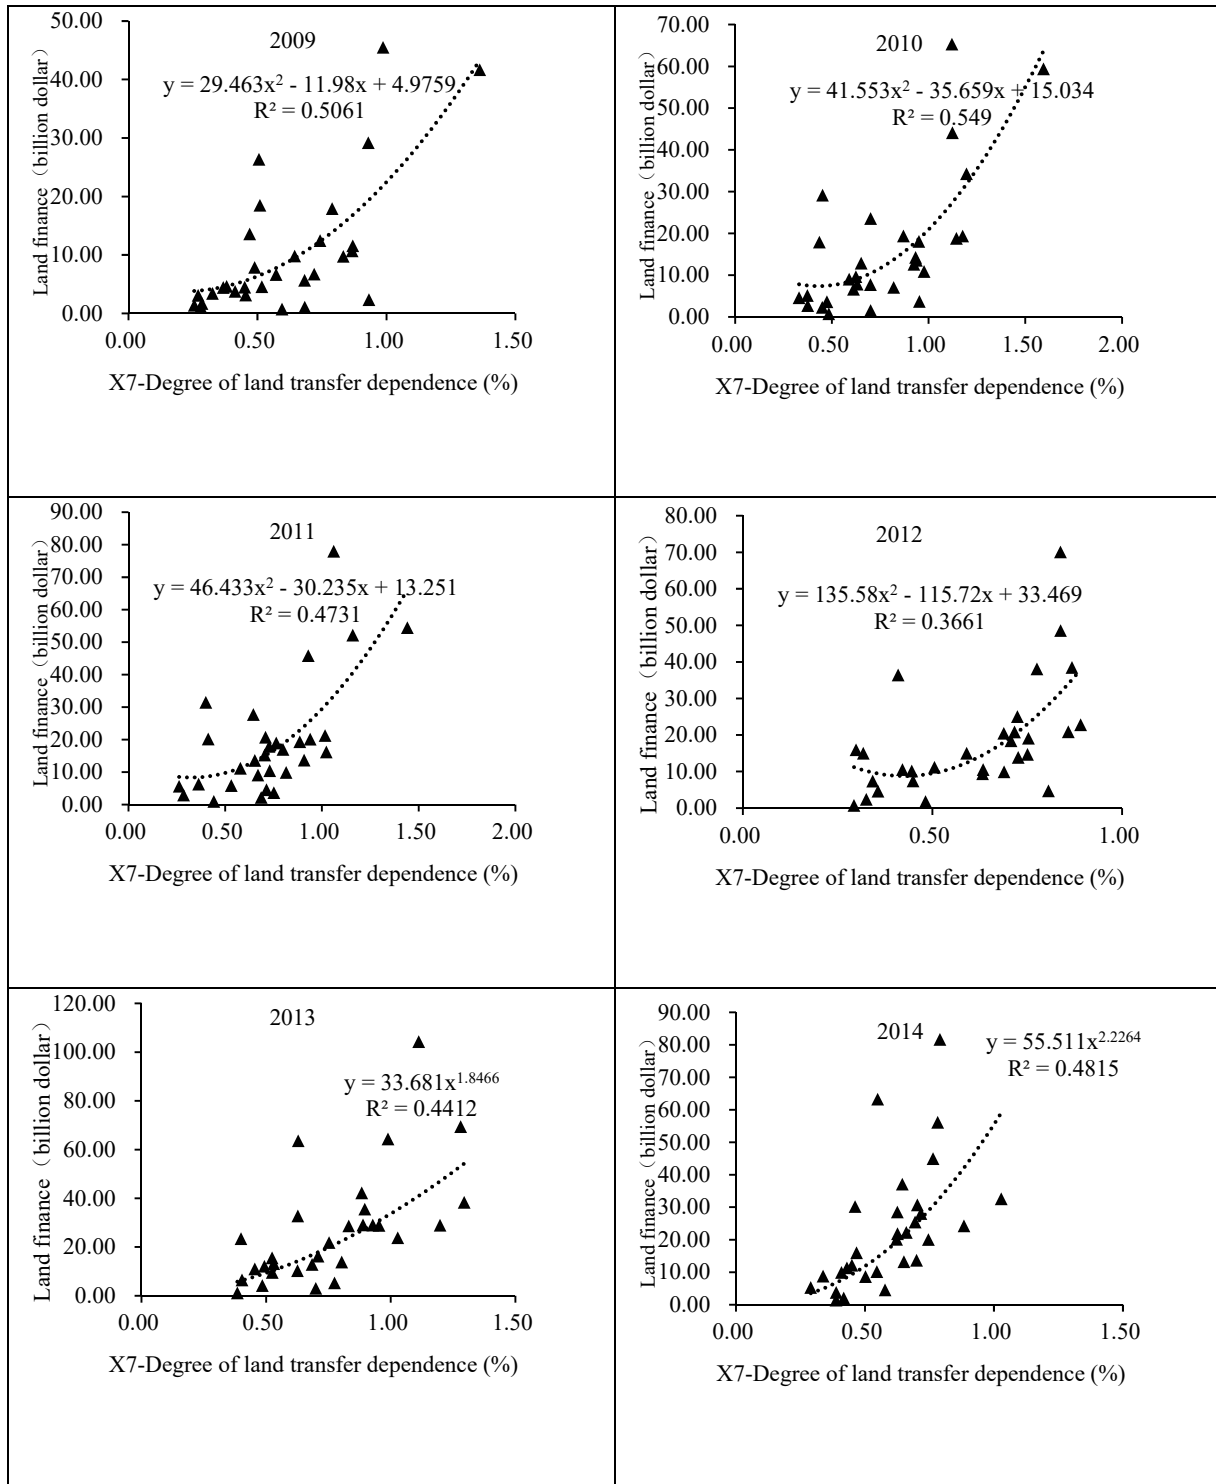

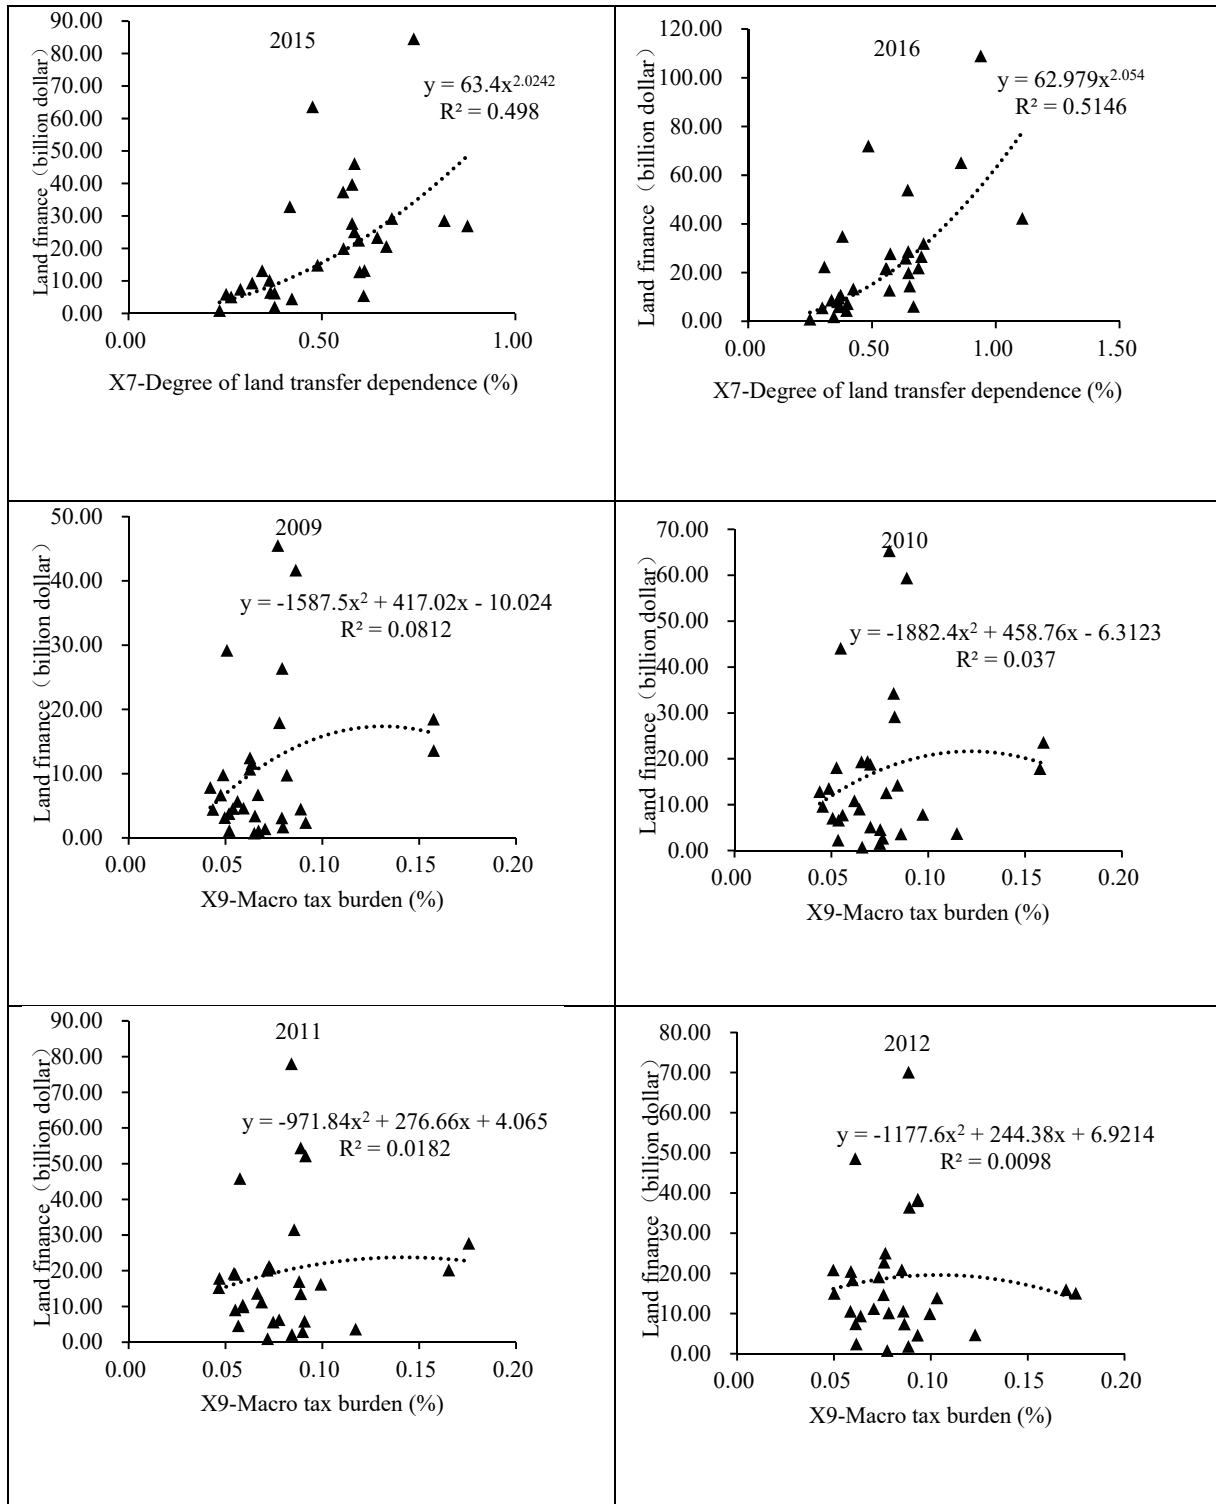

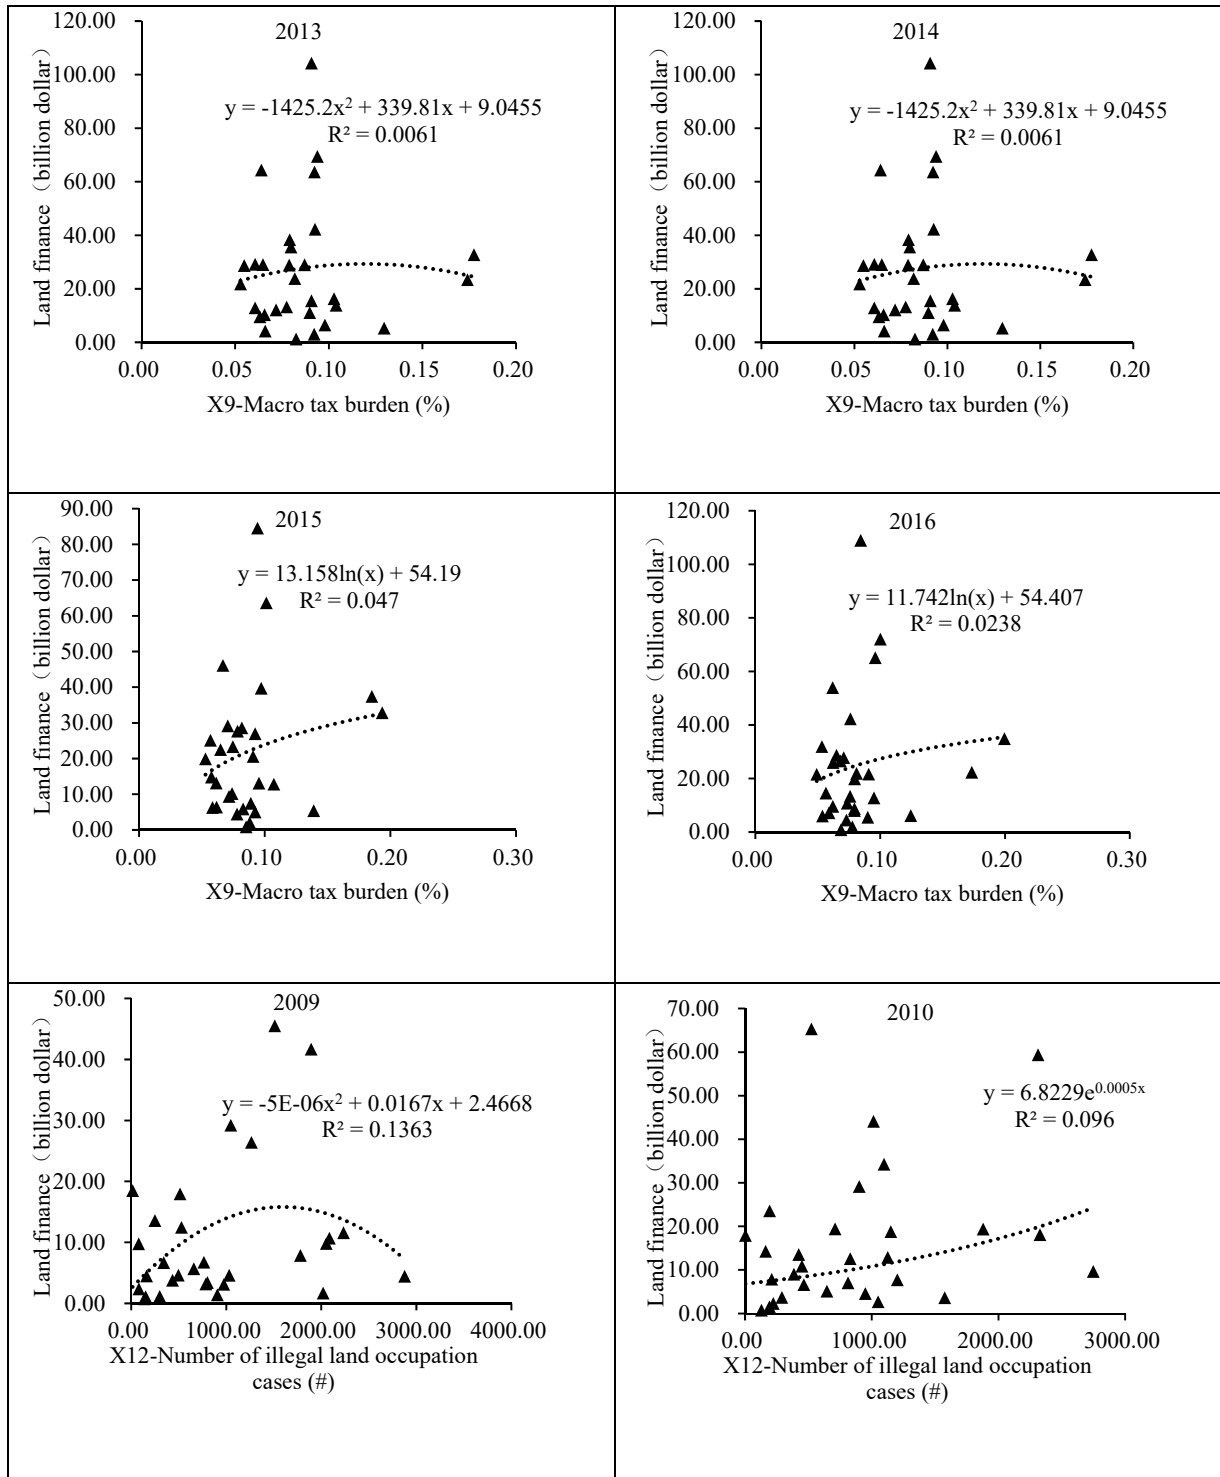



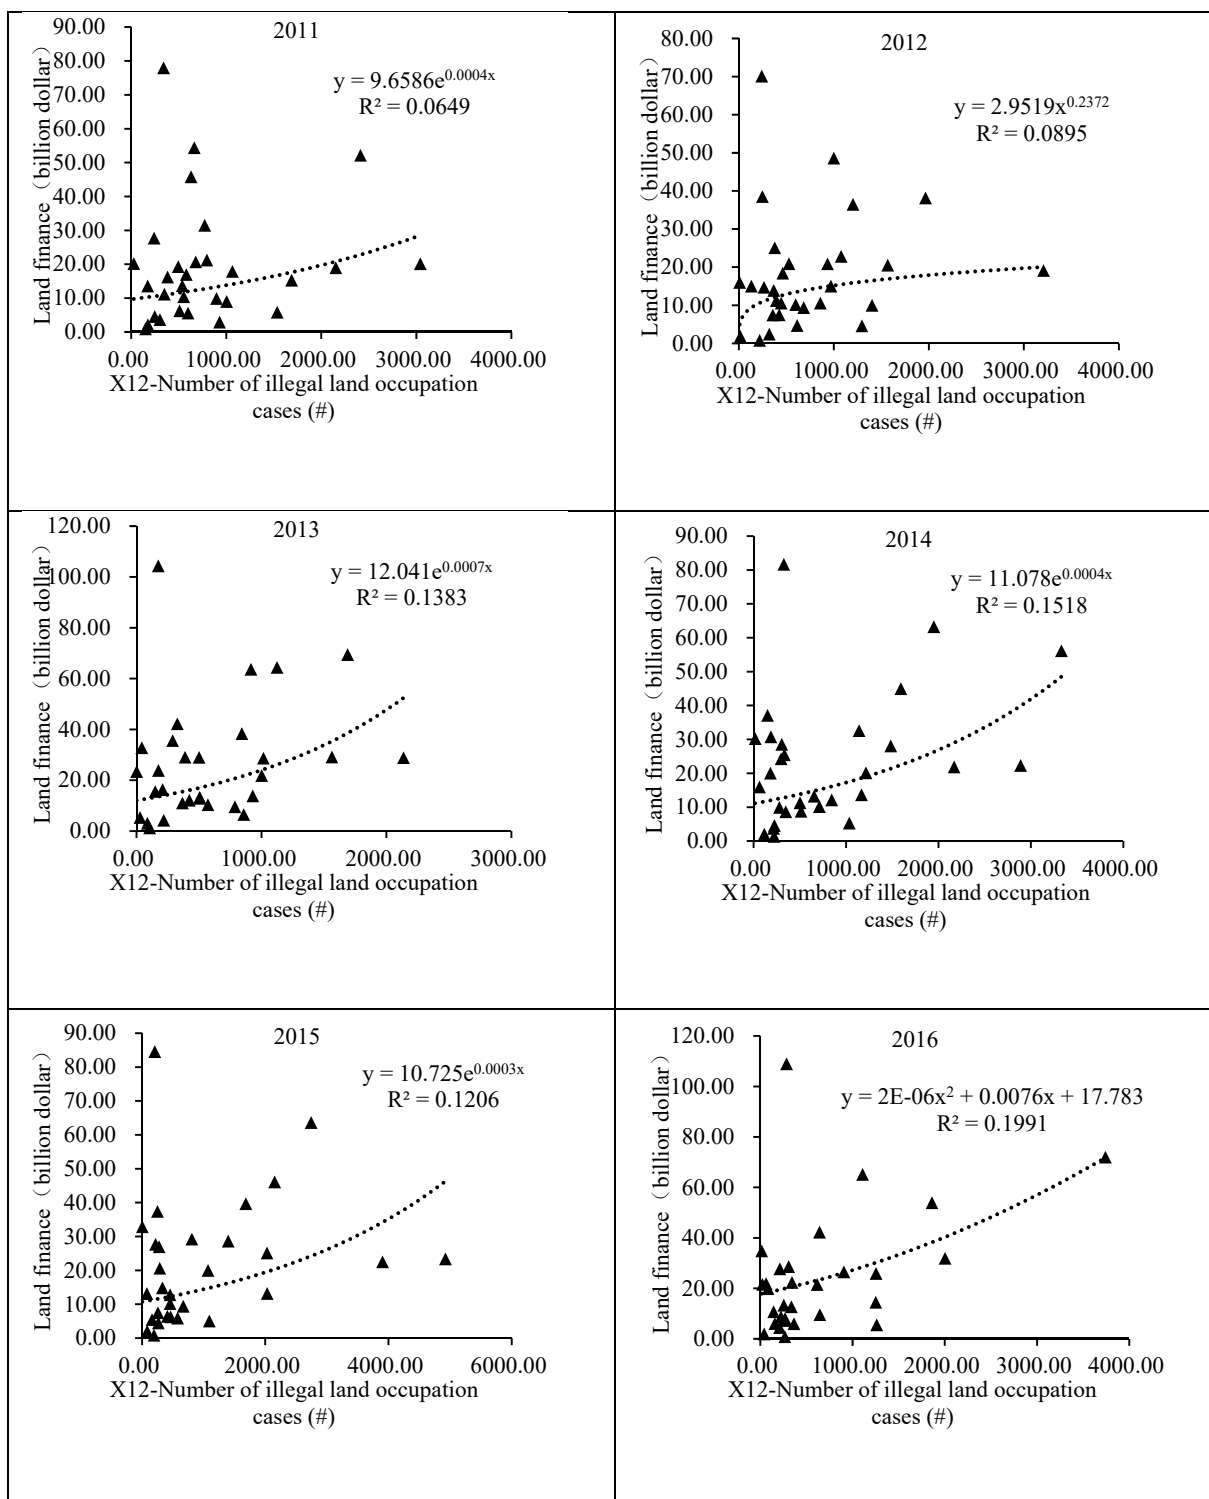

Supplement: s1 [file s1]
