# Supplementary material
Source: MDPI journal article supplement (https://www.mdpi.com/2227-9091/10/10/196)
Supplement: s1 [file s1]

Supplementary Materials I

for

**Spatial-Temporal Evolution and Risk Assessment of Land  
Finance: Evidence from China**

**Table of Contents**

**Table S1.** Pairwise comparison matrix of the land finance factors.

**Table S2** Three subzones of land finance by the k-means clustering method.

**Table S3** Land finance risks during 2009 - 2016.

**Table S4** Four types of land finance risks during 2009 - 2016.

**Table S5** Fixed-effect and random-effect models with year dummy variables.

**Table S6** Comparison of the results using normalize vs. unnormalized data.

**Table S1.** Pairwise comparison matrix of the land finance factors.

|     |                                                           | x1       | x2       | x3       | x4       | x5       | x6       | x7       | x8       | x9       | x10      | x11      | x12      | x13      | x14      | x15      |
|-----|-----------------------------------------------------------|----------|----------|----------|----------|----------|----------|----------|----------|----------|----------|----------|----------|----------|----------|----------|
| x1  | Urbanization rate                                         | 1.0<br>0 |          |          |          |          |          |          |          |          |          |          |          |          |          |          |
| x2  | Increase of developed land                                | 5.0<br>0 | 1.0<br>0 |          |          |          |          |          |          |          |          |          |          |          |          |          |
| x3  | Average housing price growth rate                         | 7.0<br>0 | 5.0<br>0 | 1.0<br>0 |          |          |          |          |          |          |          |          |          |          |          |          |
| x4  | The income disparity between urban and rural residents    | 0.1<br>0 | 0.2<br>0 | 0.1<br>4 | 1.0<br>0 |          |          |          |          |          |          |          |          |          |          |          |
| x5  | Degree of development of land markets                     | 7.0<br>0 | 7.0<br>0 | 3.0<br>0 | 9.0<br>0 | 1.0<br>0 |          |          |          |          |          |          |          |          |          |          |
| x6  | Cultivated land per capita                                | 0.3<br>3 | 0.1<br>1 | 0.1<br>1 | 0.2<br>0 | 0.1<br>1 | 1.0<br>0 |          |          |          |          |          |          |          |          |          |
| x7  | Degree of land transfer dependence                        | 9.0<br>0 | 9.0<br>0 | 5.0<br>0 | 9.0<br>0 | 3.0<br>0 | 9.0<br>0 | 1.0<br>0 |          |          |          |          |          |          |          |          |
| x8  | Deficit ratio                                             | 0.3<br>3 | 0.1<br>4 | 0.1<br>4 | 0.3<br>3 | 0.1<br>1 | 3.0<br>0 | 0.1<br>1 | 1.0<br>0 |          |          |          |          |          |          |          |
| x9  | Macro tax burden                                          | 0.3<br>3 | 0.1<br>4 | 0.1<br>4 | 0.3<br>3 | 0.1<br>1 | 3.0<br>0 | 0.1<br>1 | 1.0<br>0 | 1.0<br>0 |          |          |          |          |          |          |
| x10 | The asset-liability ratio of real estate enterprises      | 7.0<br>0 | 3.0<br>0 | 0.3<br>3 | 7.0<br>0 | 0.3<br>3 | 7.0<br>0 | 0.2<br>0 | 7.0<br>0 | 7.0<br>0 | 1.0<br>0 |          |          |          |          |          |
| x11 | Number of land violation cases                            | 3.0<br>0 | 0.3<br>3 | 0.2<br>0 | 3.0<br>0 | 0.1<br>4 | 3.0<br>0 | 0.1<br>4 | 3.0<br>0 | 5.0<br>0 | 0.2<br>0 | 1.0<br>0 |          |          |          |          |
| x12 | Number of illegal land occupation cases                   | 5.0<br>0 | 0.3<br>3 | 0.2<br>0 | 3.0<br>0 | 0.2<br>0 | 5.0<br>0 | 0.1<br>4 | 5.0<br>0 | 5.0<br>0 | 0.2<br>0 | 3.0<br>0 | 1.0<br>0 |          |          |          |
| x13 | Percentage of cultivated land in illegal occupation cases | 5.0<br>0 | 0.3<br>3 | 0.2<br>0 | 3.0<br>0 | 0.2<br>0 | 5.0<br>0 | 0.1<br>4 | 5.0<br>0 | 5.0<br>0 | 0.2<br>0 | 3.0<br>0 | 1.0<br>0 | 1.0<br>0 |          |          |
| x14 | Percentage of cultivated land area                        | 5.0<br>0 | 1.0<br>0 | 0.3<br>3 | 5.0<br>0 | 0.2<br>0 | 5.0<br>0 | 0.2<br>0 | 5.0<br>0 | 7.0<br>0 | 0.3<br>3 | 3.0<br>0 | 3.0<br>0 | 3.0<br>0 | 1.0<br>0 |          |
| x15 | Cultivated land decrease rate                             | 5.0<br>0 | 1.0<br>0 | 0.3<br>3 | 5.0<br>0 | 0.2<br>0 | 5.0<br>0 | 0.2<br>0 | 5.0<br>0 | 7.0<br>0 | 0.3<br>3 | 3.0<br>0 | 3.0<br>0 | 3.0<br>0 | 1.0<br>0 | 1.0<br>0 |

**Table S2.** Three subzones of land finance by the k-means clustering method.

| Zone 1 (Western area) | Zone 2 (Central area) | Zone 3 (Eastern coastal area) |
|-----------------------|-----------------------|-------------------------------|
| Gansu                 | Anhui                 | Fujian                        |
| Guangxi               | Beijing               | Guangdong                     |
| Guizhou               | Chongqing             | Jiangsu                       |
| Hainan                | Hebei                 | Shandong                      |
| Heilongjiang          | Henan                 | Shanghai                      |
| Jilin                 | Hubei                 | Zhejiang                      |
| Neimenggu             | Hunan                 |                               |
| Ningxia               | Jiangxi               |                               |
| Qinghai               | Liaoning              |                               |
| Shaanxi               | Sichuan               |                               |
| Shanxi                | Tianjin               |                               |
| Xinjiang              |                       |                               |
| Yunnan                |                       |                               |

**Table S3.** Land finance risks during 2009 - 2016.

| Areas           | Province     | 2009  | 2010  | 2011  | 2012  | 2013  | 2014  | 2015  | 2016  |
|-----------------|--------------|-------|-------|-------|-------|-------|-------|-------|-------|
| Western         | Gansu        | 40.78 | 39.02 | 37.49 | 35.38 | 34.41 | 32.21 | 32.61 | 32.88 |
|                 | Guangxi      | 47.44 | 50.03 | 48.94 | 47.24 | 45.36 | 46.06 | 46.15 | 46.53 |
|                 | Guizhou      | 38.65 | 41.07 | 39.87 | 38.16 | 37.99 | 35.45 | 32.65 | 31.20 |
|                 | Hainan       | 40.96 | 48.10 | 32.73 | 32.44 | 33.19 | 32.25 | 29.01 | 30.45 |
|                 | Heilongjiang | 30.01 | 31.06 | 32.49 | 27.07 | 29.33 | 29.47 | 29.11 | 29.18 |
|                 | Jilin        | 38.18 | 40.12 | 40.73 | 33.41 | 36.17 | 36.12 | 32.07 | 35.51 |
|                 | Neimenggu    | 34.92 | 38.21 | 35.25 | 35.85 | 46.22 | 32.56 | 29.80 | 27.95 |
|                 | Ningxia      | 34.60 | 32.72 | 31.96 | 29.63 | 32.57 | 24.45 | 26.71 | 24.20 |
|                 | Qinghai      | 44.85 | 43.39 | 42.93 | 39.11 | 39.50 | 40.11 | 35.00 | 33.56 |
|                 | Shaanxi      | 35.13 | 37.76 | 36.28 | 33.19 | 33.28 | 31.19 | 30.48 | 31.35 |
|                 | Shanxi       | 27.88 | 31.34 | 28.87 | 28.20 | 30.17 | 27.90 | 27.89 | 28.84 |
|                 | Xinjiang     | 43.96 | 40.71 | 39.08 | 33.28 | 33.02 | 32.11 | 30.90 | 33.64 |
|                 | Yunnan       | 44.25 | 46.82 | 51.61 | 44.91 | 44.83 | 42.35 | 37.10 | 38.95 |
| Central         | Anhui        | 39.78 | 41.50 | 38.93 | 36.55 | 41.60 | 38.45 | 33.51 | 37.53 |
|                 | Beijing      | 40.65 | 45.07 | 42.11 | 40.03 | 42.42 | 43.06 | 40.95 | 42.93 |
|                 | Chongqing    | 34.92 | 38.21 | 35.25 | 35.85 | 46.22 | 32.56 | 29.80 | 27.95 |
|                 | Hebei        | 37.31 | 40.34 | 36.91 | 34.86 | 40.84 | 36.68 | 37.00 | 35.03 |
|                 | Henan        | 35.02 | 34.22 | 35.20 | 34.36 | 37.68 | 32.53 | 30.87 | 33.20 |
|                 | Hubei        | 43.15 | 45.20 | 46.74 | 41.32 | 45.44 | 39.00 | 38.64 | 40.34 |
|                 | Hunan        | 42.69 | 48.09 | 49.58 | 44.57 | 48.49 | 45.48 | 44.10 | 45.60 |
|                 | Jiangxi      | 32.90 | 33.74 | 34.68 | 31.47 | 35.51 | 31.85 | 29.80 | 29.61 |
|                 | Liaoning     | 36.91 | 43.27 | 45.47 | 34.73 | 35.19 | 32.51 | 29.29 | 30.55 |
|                 | Sichuan      | 48.63 | 49.66 | 49.11 | 46.47 | 48.23 | 49.69 | 45.94 | 41.19 |
|                 | Tianjin      | 39.67 | 41.15 | 34.28 | 28.00 | 30.43 | 31.40 | 34.00 | 37.96 |
| Eastern coastal | Fujian       | 38.65 | 40.77 | 42.50 | 37.92 | 41.16 | 36.76 | 40.06 | 37.28 |
|                 | Guangdong    | 48.44 | 45.76 | 44.49 | 50.44 | 52.25 | 51.70 | 49.23 | 58.42 |
|                 | Jiangsu      | 43.17 | 41.44 | 38.73 | 35.34 | 41.54 | 34.28 | 33.20 | 37.86 |
|                 | Shandong     | 42.04 | 41.09 | 37.38 | 36.74 | 43.34 | 38.56 | 33.54 | 34.56 |
|                 | Shanghai     | 28.52 | 23.08 | 22.84 | 20.67 | 26.14 | 24.28 | 21.77 | 22.91 |
|                 | Zhejiang     | 47.76 | 53.09 | 46.12 | 40.00 | 46.71 | 37.93 | 34.40 | 38.37 |

**Table S4.** Four types of land finance risks during 2009 - 2016.

| Factor        | Areas           | Province     | 2009  | 2010  | 2011  | 2012  | 2013  | 2014  | 2015  | 2016  |
|---------------|-----------------|--------------|-------|-------|-------|-------|-------|-------|-------|-------|
| Social risk   | Western         | Gansu        | 42.43 | 39.84 | 38.32 | 37.15 | 35.86 | 35.53 | 29.67 | 32.63 |
|               |                 | Guangxi      | 65.82 | 63.57 | 61.68 | 59.04 | 55.65 | 57.27 | 53.94 | 55.52 |
|               |                 | Guizhou      | 45.62 | 46.11 | 42.79 | 34.72 | 30.39 | 27.92 | 26.78 | 25.65 |
|               |                 | Hainan       | 41.65 | 54.17 | 26.34 | 24.50 | 26.24 | 29.54 | 20.30 | 21.47 |
|               |                 | Heilongjiang | 35.92 | 30.53 | 30.32 | 30.66 | 32.26 | 31.16 | 33.97 | 36.31 |
|               |                 | Jilin        | 50.36 | 42.83 | 44.08 | 34.37 | 39.59 | 43.58 | 39.23 | 45.91 |
|               |                 | Neimenggu    | 55.15 | 43.00 | 40.41 | 37.72 | 34.56 | 32.92 | 34.77 | 36.40 |
|               |                 | Ningxia      | 30.53 | 27.10 | 24.48 | 23.97 | 28.03 | 18.29 | 23.20 | 19.88 |
|               |                 | Qinghai      | 52.91 | 51.36 | 49.12 | 46.32 | 45.48 | 44.94 | 39.69 | 35.88 |
|               |                 | Shaanxi      | 43.44 | 46.91 | 47.32 | 35.09 | 30.88 | 28.29 | 31.41 | 31.49 |
|               |                 | Shanxi       | 29.31 | 33.55 | 27.97 | 27.69 | 27.19 | 25.27 | 26.00 | 25.50 |
|               |                 | Xinjiang     | 62.71 | 51.24 | 50.61 | 34.13 | 30.27 | 29.92 | 27.49 | 31.94 |
|               |                 | Yunnan       | 59.65 | 57.95 | 56.88 | 50.66 | 51.90 | 54.55 | 46.55 | 48.60 |
|               | Central         | Anhui        | 35.75 | 32.68 | 32.39 | 28.69 | 26.85 | 26.94 | 23.66 | 27.54 |
|               |                 | Beijing      | 50.09 | 54.05 | 47.97 | 55.90 | 51.58 | 50.52 | 49.45 | 60.90 |
|               |                 | Chongqing    | 35.07 | 34.63 | 32.73 | 32.82 | 45.61 | 24.37 | 18.38 | 19.49 |
|               |                 | Hebei        | 37.19 | 30.88 | 29.89 | 29.93 | 31.97 | 29.37 | 27.36 | 28.26 |
|               |                 | Henan        | 41.84 | 37.17 | 35.77 | 35.86 | 34.22 | 27.77 | 26.54 | 27.30 |
|               |                 | Hubei        | 59.57 | 51.90 | 55.43 | 47.88 | 49.87 | 42.93 | 41.13 | 46.84 |
|               |                 | Hunan        | 54.51 | 57.57 | 61.37 | 56.47 | 58.78 | 56.45 | 55.80 | 59.13 |
|               |                 | Jiangxi      | 30.83 | 23.66 | 27.48 | 24.45 | 25.53 | 25.47 | 23.27 | 23.51 |
|               |                 | Liaoning     | 37.78 | 34.79 | 33.59 | 31.21 | 30.43 | 31.12 | 30.41 | 34.31 |
|               |                 | Sichuan      | 61.25 | 57.22 | 61.25 | 54.96 | 54.89 | 63.52 | 58.78 | 49.21 |
|               |                 | Tianjin      | 46.42 | 46.16 | 39.20 | 34.09 | 35.95 | 39.09 | 43.71 | 49.89 |
|               | Eastern coastal | Fujian       | 29.47 | 25.86 | 32.37 | 27.36 | 30.09 | 28.22 | 28.24 | 31.01 |
|               |                 | Guangdong    | 66.52 | 64.02 | 61.97 | 72.95 | 66.72 | 67.33 | 62.21 | 75.66 |
|               |                 | Jiangsu      | 42.40 | 39.27 | 35.39 | 35.82 | 39.80 | 34.31 | 34.35 | 37.47 |
|               |                 | Shandong     | 43.14 | 35.64 | 35.82 | 35.22 | 39.93 | 33.37 | 32.44 | 33.11 |
|               |                 | Shanghai     | 31.11 | 19.63 | 18.46 | 18.15 | 24.47 | 19.81 | 20.09 | 21.87 |
|               |                 | Zhejiang     | 32.21 | 32.91 | 31.72 | 34.21 | 32.29 | 28.26 | 27.22 | 30.45 |
| Economic risk | Western         | Gansu        | 18.78 | 27.33 | 39.70 | 23.59 | 31.46 | 27.89 | 30.74 | 29.71 |
|               |                 | Guangxi      | 27.92 | 36.59 | 35.66 | 34.13 | 36.40 | 35.03 | 33.82 | 36.29 |
|               |                 | Guizhou      | 23.13 | 30.54 | 34.19 | 41.29 | 48.13 | 43.01 | 38.65 | 36.28 |
|               |                 | Hainan       | 50.20 | 52.72 | 43.91 | 45.01 | 44.64 | 36.14 | 38.17 | 40.73 |
|               |                 | Heilongjiang | 22.26 | 32.36 | 38.25 | 21.34 | 25.33 | 25.67 | 21.76 | 20.53 |
|               |                 | Jilin        | 27.47 | 44.04 | 44.50 | 36.87 | 36.87 | 32.49 | 26.15 | 28.16 |
|               |                 | Neimenggu    | 22.80 | 36.40 | 34.46 | 31.30 | 31.64 | 28.72 | 27.56 | 27.77 |
|               |                 | Ningxia      | 39.87 | 41.86 | 40.82 | 32.40 | 41.86 | 29.43 | 28.71 | 26.91 |
|               |                 | Qinghai      | 33.38 | 34.81 | 32.65 | 27.01 | 30.69 | 31.76 | 25.59 | 24.87 |
|               |                 | Shaanxi      | 21.48 | 23.47 | 19.56 | 28.64 | 33.03 | 29.74 | 24.14 | 26.16 |
|               |                 | Shanxi       | 20.84 | 24.28 | 26.77 | 26.65 | 32.06 | 26.87 | 23.49 | 28.43 |
|               |                 | Xinjiang     | 17.94 | 24.44 | 20.74 | 24.90 | 27.77 | 23.73 | 23.66 | 25.07 |
|               |                 | Yunnan       | 30.20 | 38.22 | 55.62 | 43.11 | 42.06 | 29.68 | 24.41 | 26.58 |
|               | Central         | Anhui        | 45.12 | 57.82 | 52.64 | 46.87 | 65.02 | 53.67 | 44.94 | 57.80 |
|               |                 | Beijing      | 29.99 | 40.71 | 38.77 | 23.86 | 37.59 | 38.38 | 34.60 | 23.26 |
|               |                 | Chongqing    | 35.83 | 45.50 | 40.40 | 43.33 | 58.17 | 45.03 | 45.27 | 36.92 |
|               |                 | Hebei        | 33.74 | 50.98 | 42.37 | 39.70 | 49.38 | 38.25 | 37.09 | 38.04 |
|               |                 | Henan        | 24.85 | 33.79 | 38.21 | 38.71 | 44.44 | 40.01 | 34.13 | 40.39 |
|               |                 | Hubei        | 29.01 | 45.16 | 44.43 | 37.97 | 47.84 | 37.80 | 37.37 | 36.16 |
|               |                 | Hunan        | 20.81 | 32.79 | 37.03 | 32.85 | 40.16 | 34.46 | 31.76 | 32.95 |
|               |                 | Jiangxi      | 34.06 | 47.99 | 44.57 | 39.08 | 51.48 | 39.91 | 36.83 | 36.19 |
|               |                 | Liaoning     | 42.05 | 60.16 | 72.13 | 46.25 | 47.12 | 35.42 | 29.62 | 28.00 |
|               |                 | Sichuan      | 39.66 | 45.31 | 37.68 | 39.82 | 47.23 | 39.70 | 34.37 | 34.19 |

| Factor          | Areas           | Province        | 2009   | 2010  | 2011  | 2012  | 2013  | 2014  | 2015  | 2016  |
|-----------------|-----------------|-----------------|--------|-------|-------|-------|-------|-------|-------|-------|
|                 | Eastern coastal | Tianjin         | 42.31  | 46.66 | 34.99 | 23.39 | 28.36 | 26.42 | 21.56 | 31.64 |
|                 |                 | Fujian          | 43.22  | 56.83 | 46.74 | 38.93 | 48.50 | 35.89 | 34.85 | 37.16 |
|                 |                 | Guangdong       | 28.61  | 26.55 | 24.79 | 25.04 | 35.78 | 32.78 | 29.95 | 30.57 |
|                 |                 | Jiangsu         | 48.86  | 54.87 | 52.78 | 42.88 | 55.34 | 41.46 | 39.36 | 48.64 |
|                 |                 | Shandong        | 47.30  | 56.53 | 48.71 | 45.22 | 51.55 | 42.61 | 34.20 | 36.96 |
|                 |                 | Shanghai        | 27.16  | 24.40 | 23.42 | 18.23 | 23.07 | 26.36 | 24.17 | 22.77 |
|                 |                 | Zhejiang        | 68.20  | 78.73 | 59.32 | 40.99 | 64.90 | 41.65 | 33.63 | 46.24 |
| Legal risk      | Western         | Gansu           | 24.24  | 18.09 | 19.92 | 24.68 | 19.36 | 18.55 | 19.23 | 22.04 |
|                 |                 | Guangxi         | 27.34  | 33.14 | 33.70 | 33.75 | 26.28 | 29.05 | 43.15 | 35.09 |
|                 |                 | Guizhou         | 46.97  | 45.47 | 39.34 | 36.95 | 33.91 | 35.76 | 29.80 | 28.69 |
|                 |                 | Hainan          | 10.72  | 14.77 | 16.52 | 17.86 | 18.41 | 20.70 | 23.02 | 23.38 |
|                 |                 | Heilongjiang    | 22.54  | 26.73 | 23.87 | 23.63 | 25.17 | 28.92 | 26.35 | 22.13 |
|                 |                 | Jilin           | 24.99  | 26.77 | 25.99 | 23.40 | 25.94 | 22.84 | 22.95 | 20.92 |
|                 |                 | Neimenggu       | 16.75  | 14.52 | 16.49 | 17.60 | 20.16 | 16.75 | 16.27 | 12.43 |
|                 |                 | Ningxia         | 22.75  | 17.31 | 22.73 | 27.31 | 13.20 | 16.08 | 17.84 | 15.10 |
|                 |                 | Qinghai         | 24.70  | 16.81 | 25.79 | 20.90 | 17.89 | 21.52 | 16.60 | 20.44 |
|                 |                 | Shaanxi         | 28.58  | 31.23 | 28.46 | 25.27 | 29.34 | 30.56 | 28.43 | 29.60 |
|                 |                 | Shanxi          | 29.31  | 32.03 | 26.91 | 23.45 | 26.39 | 28.55 | 33.85 | 30.75 |
|                 |                 | Xinjiang        | 22.85  | 23.86 | 22.96 | 25.64 | 29.63 | 33.65 | 33.16 | 34.83 |
|                 | Yunnan          | 17.93           | 23.19  | 20.28 | 21.93 | 19.79 | 22.33 | 23.29 | 24.70 |       |
|                 | Central         | Anhui           | 47.89  | 40.87 | 35.62 | 44.01 | 43.68 | 47.25 | 43.24 | 29.42 |
|                 |                 | Beijing         | 22.18  | 15.70 | 18.73 | 12.87 | 11.95 | 18.02 | 15.29 | 18.42 |
|                 |                 | Chongqing       | 27.68  | 30.69 | 27.84 | 25.04 | 22.61 | 25.26 | 24.43 | 26.71 |
|                 |                 | Hebei           | 46.67  | 48.89 | 47.81 | 39.48 | 52.52 | 57.22 | 68.50 | 49.61 |
|                 |                 | Henan           | 46.38  | 35.51 | 36.65 | 29.28 | 44.65 | 39.31 | 45.04 | 44.54 |
|                 |                 | Hubei           | 21.28  | 24.22 | 25.38 | 26.39 | 26.17 | 26.33 | 30.50 | 26.81 |
|                 |                 | Hunan           | 46.79  | 48.04 | 36.61 | 26.83 | 30.16 | 29.63 | 28.23 | 25.32 |
|                 |                 | Jiangxi         | 23.08  | 20.73 | 22.87 | 22.72 | 19.11 | 20.20 | 20.02 | 19.36 |
|                 |                 | Liaoning        | 21.10  | 35.47 | 27.24 | 18.95 | 22.62 | 28.41 | 21.37 | 21.41 |
|                 |                 | Sichuan         | 19.26  | 27.43 | 28.16 | 24.94 | 20.52 | 20.34 | 21.53 | 19.37 |
|                 |                 | Tianjin         | 17.52  | 18.74 | 19.53 | 18.33 | 17.95 | 19.08 | 33.57 | 18.33 |
|                 |                 | Eastern coastal | Fujian | 41.95 | 37.23 | 51.53 | 53.43 | 45.44 | 49.60 | 74.94 |
|                 | Guangdong       |                 | 28.31  | 21.45 | 23.32 | 29.31 | 37.36 | 38.47 | 44.05 | 63.84 |
|                 | Jiangsu         |                 | 44.19  | 28.00 | 26.17 | 23.71 | 25.84 | 24.33 | 21.47 | 22.82 |
|                 | Shandong        |                 | 40.64  | 36.97 | 28.34 | 33.70 | 50.25 | 58.25 | 45.37 | 43.96 |
|                 | Shanghai        |                 | 18.29  | 21.49 | 25.65 | 23.42 | 30.33 | 24.67 | 11.40 | 17.01 |
|                 | Zhejiang        |                 | 45.56  | 56.75 | 56.26 | 47.46 | 45.73 | 50.46 | 47.49 | 35.99 |
| Ecological risk | Western         | Gansu           | 71.08  | 68.56 | 68.60 | 68.62 | 68.64 | 68.65 | 68.66 | 68.67 |
|                 |                 | Guangxi         | 59.38  | 58.60 | 58.63 | 58.66 | 58.67 | 58.68 | 58.73 | 58.78 |
|                 |                 | Guizhou         | 48.48  | 48.20 | 48.21 | 48.27 | 48.32 | 48.37 | 48.41 | 48.45 |
|                 |                 | Hainan          | 54.73  | 54.68 | 54.75 | 54.82 | 54.82 | 54.84 | 54.85 | 54.92 |
|                 |                 | Heilongjiang    | 42.50  | 37.17 | 37.20 | 37.21 | 37.18 | 37.17 | 37.19 | 37.20 |
|                 |                 | Jilin           | 35.63  | 31.46 | 31.47 | 31.51 | 31.56 | 31.61 | 31.63 | 31.67 |
|                 |                 | Neimenggu       | 79.04  | 74.56 | 74.56 | 74.56 | 74.57 | 74.56 | 74.51 | 74.51 |
|                 |                 | Ningxia         | 60.24  | 57.69 | 57.73 | 57.77 | 57.81 | 57.79 | 57.69 | 57.65 |
|                 |                 | Qinghai         | 85.96  | 84.65 | 84.66 | 84.65 | 84.64 | 84.59 | 84.72 | 84.67 |
|                 |                 | Shaanxi         | 57.41  | 57.63 | 57.66 | 57.68 | 57.68 | 57.65 | 57.63 | 57.65 |
|                 |                 | Shanxi          | 48.11  | 48.08 | 48.10 | 48.10 | 48.11 | 48.15 | 48.16 | 48.16 |
|                 |                 | Xinjiang        | 85.15  | 81.35 | 81.38 | 81.37 | 81.36 | 81.34 | 81.35 | 81.35 |
|                 | Yunnan          | 62.64           | 62.20  | 62.21 | 62.24 | 62.27 | 62.30 | 62.33 | 62.33 |       |
|                 | Central         | Anhui           | 24.96  | 24.57 | 24.66 | 24.73 | 24.73 | 24.81 | 24.83 | 24.87 |
|                 |                 | Beijing         | 65.90  | 66.26 | 66.53 | 66.67 | 66.74 | 66.74 | 66.84 | 66.93 |
|                 |                 | Chongqing       | 44.26  | 42.79 | 42.68 | 42.62 | 42.56 | 42.54 | 42.82 | 43.51 |
|                 |                 | Hebei           | 35.71  | 35.16 | 35.11 | 35.11 | 35.17 | 35.27 | 35.36 | 35.41 |
|                 |                 | Henan           | 15.18  | 14.75 | 14.88 | 14.95 | 15.06 | 15.25 | 15.38 | 15.36 |

| Factor | Areas           | Province  | 2009  | 2010  | 2011  | 2012  | 2013  | 2014  | 2015  | 2016  |
|--------|-----------------|-----------|-------|-------|-------|-------|-------|-------|-------|-------|
|        |                 | Hubei     | 46.50 | 44.33 | 44.42 | 44.50 | 44.58 | 44.70 | 44.79 | 44.86 |
|        |                 | Hunan     | 58.93 | 57.49 | 57.48 | 57.45 | 57.41 | 57.40 | 57.40 | 57.40 |
|        |                 | Jiangxi   | 60.44 | 59.00 | 59.02 | 59.03 | 59.02 | 59.01 | 59.03 | 59.05 |
|        |                 | Liaoning  | 39.36 | 35.76 | 35.91 | 36.07 | 36.18 | 36.26 | 36.31 | 36.35 |
|        |                 | Sichuan   | 67.61 | 65.57 | 65.56 | 65.53 | 65.54 | 65.53 | 65.53 | 65.54 |
|        |                 | Tianjin   | 28.62 | 28.73 | 29.10 | 29.35 | 29.51 | 29.65 | 29.72 | 29.73 |
|        | Eastern coastal | Fujian    | 69.92 | 69.78 | 69.82 | 69.82 | 69.82 | 69.82 | 69.84 | 69.84 |
|        |                 | Guangdong | 63.76 | 65.35 | 65.05 | 64.83 | 64.74 | 64.69 | 64.70 | 64.76 |
|        |                 | Jiangsu   | 20.09 | 20.78 | 20.92 | 20.98 | 21.02 | 21.11 | 21.13 | 21.17 |
|        |                 | Shandong  | 13.80 | 13.56 | 13.66 | 13.77 | 13.81 | 13.91 | 14.00 | 14.05 |
|        |                 | Shanghai  | 38.63 | 42.35 | 42.57 | 42.53 | 42.51 | 42.50 | 42.25 | 41.98 |
|        |                 | Zhejiang  | 58.10 | 57.59 | 57.62 | 57.65 | 57.68 | 57.70 | 57.70 | 57.71 |

**Table S5** Fixed-effect and random-effect models with year dummy variables.

| Basic level indicators (X – normalized variable) |                                                              | Fixed-effects          | Random-effects          | Random-effects          |
|--------------------------------------------------|--------------------------------------------------------------|------------------------|-------------------------|-------------------------|
|                                                  |                                                              | [1]                    | [2]                     | [3]                     |
| X1                                               | Urbanization rate                                            | 0.5806***<br>(3.4031)  | 0.2159**<br>(2.2553)    | 0.2509***<br>(2.8621)   |
| X2                                               | Increase of developed land                                   | 0.1024***<br>(3.3565)  | 0.1310***<br>(3.9589)   | 0.1251***<br>(3.9632)   |
| X3                                               | Average housing price growth rate                            | 0.0343<br>(1.2984)     | 0.0316<br>(1.1009)      |                         |
| X4                                               | The income disparity between urban &<br>rural residents      | 0.1888***<br>(3.3023)  | 0.1607***<br>(2.8576)   | 0.1730***<br>(3.2061)   |
| X5                                               | Degree of land market development                            | -0.0658*<br>(-1.8596)  | -0.0799**<br>(-2.4718)  | -0.0792**<br>(-2.5432)  |
| X6                                               | Per capita cultivated land                                   | 1.6478**<br>(2.1116)   | 0.0087<br>(0.1085)      |                         |
| X7                                               | Degree of land transfer dependence                           | 0.3279***<br>(10.0555) | 0.3421***<br>(10.1188)  | 0.3566***<br>(10.7099)  |
| X8                                               | Deficit rate                                                 | -0.2526**<br>(-2.0957) | -0.2453***<br>(-2.6910) | -0.2651***<br>(-3.2613) |
| X9                                               | Macro tax burden                                             | 0.2505***<br>(2.7975)  | 0.0865<br>(1.1648)      |                         |
| X10                                              | The asset-liability ratio of real estate<br>enterprises      | -0.0033<br>(-0.0791)   | 0.0107<br>(0.2611)      |                         |
| X11                                              | Number of land violation cases                               | 0.0034<br>(0.1219)     | -0.0191<br>(-0.6270)    |                         |
| X12                                              | Number of illegal land occupation cases                      | 0.0935***<br>(2.7452)  | 0.0987***<br>(2.7008)   | 0.0920***<br>(2.8650)   |
| X13                                              | Percentage of cultivated land in illegal<br>occupation cases | -0.0257<br>(-1.1740)   | -0.0164<br>(-0.6970)    |                         |
| X14                                              | Percentage of cultivated land area                           | -1.5907<br>(-1.2205)   | 0.0866<br>(1.1918)      |                         |
| X15                                              | Cultivated land decrease rate                                | -0.0853**<br>(-2.1844) | -0.1020**<br>(-2.4140)  | -0.0987**<br>(-2.3586)  |
| 2010.year                                        |                                                              | 0.0086<br>(0.8080)     | 0.0199*<br>(1.7747)     | 0.0190*<br>(1.7357)     |
| 2011.year                                        |                                                              | 0.0258**<br>(2.0632)   | 0.0434***<br>(3.5833)   | 0.0432***<br>(3.7910)   |
| 2012.year                                        |                                                              | 0.0370**<br>(2.4551)   | 0.0623***<br>(4.6656)   | 0.0630***<br>(5.2301)   |
| 2013.year                                        |                                                              | 0.0580***<br>(3.1675)  | 0.0871***<br>(5.2650)   | 0.0871***<br>(5.8570)   |
| 2014.year                                        |                                                              | 0.0614***<br>(3.1260)  | 0.0962***<br>(5.7126)   | 0.0973***<br>(6.6693)   |



|                            |                       |                       |                       |
|----------------------------|-----------------------|-----------------------|-----------------------|
| 2015.year                  | 0.0747***<br>(3.5216) | 0.1142***<br>(6.4667) | 0.1166***<br>(7.4444) |
| 2016.year                  | 0.0869***<br>(3.8907) | 0.1247***<br>(6.8119) | 0.1245***<br>(7.2992) |
| Constant                   |                       | -0.1138<br>(-1.2085)  | -0.0586<br>(-0.8232)  |
| Spatial weights ( $\rho$ ) | 0.1689***<br>(2.7321) | 0.1752***<br>(2.8091) | 0.1834***<br>(3.1262) |
| $R^2$ or Adj. $R^2$        | 0.166                 | 0.675                 | 0.666                 |

---

**Table S6** Comparison of the results using normalize vs. unnormalized data.

| Variables | Normalized              |                         | Unnormalized             |                          |
|-----------|-------------------------|-------------------------|--------------------------|--------------------------|
| X1        | 0.4642***<br>(3.4856)   | 0.2159**<br>(2.2553)    | 0.8419***<br>(3.4852)    | 0.3920**<br>(2.2589)     |
| X2        | 0.1483***<br>(4.4383)   | 0.1310***<br>(3.9589)   | 0.0005***<br>(4.4388)    | 0.0005***<br>(3.9591)    |
| X3        | -0.0111<br>(-0.3778)    | 0.0316<br>(1.1009)      | -1.7614<br>(-0.3774)     | 5.0052<br>(1.1024)       |
| X4        | 0.0520<br>(0.8732)      | 0.1607***<br>(2.8576)   | 2.3118<br>(0.8737)       | 7.1453***<br>(2.8593)    |
| X5        | -0.0928***<br>(-2.6519) | -0.0799**<br>(-2.4718)  | -12.5483***<br>(-2.6527) | -10.8053**<br>(-2.4715)  |
| X6        | 0.0906<br>(0.8169)      | 0.0087<br>(0.1085)      | 2.3919<br>(0.8162)       | 0.2272<br>(0.1069)       |
| X7        | 0.2669***<br>(8.8540)   | 0.3421***<br>(10.1188)  | 21.2641***<br>(8.8550)   | 27.2451***<br>(10.1192)  |
| X8        | -0.0305<br>(-0.3144)    | -0.2453***<br>(-2.6910) | -6.6031<br>(-0.3159)     | -52.8708***<br>(-2.6909) |
| X9        | 0.2264***<br>(2.8354)   | 0.0865<br>(1.1648)      | 155.6181***<br>(2.8361)  | 59.2373<br>(1.1613)      |
| X10       | 0.0745*<br>(1.6478)     | 0.0107<br>(0.2611)      | 0.2890*<br>(1.6482)      | 0.0416<br>(0.2607)       |
| X11       | 0.0038<br>(0.1212)      | -0.0191<br>(-0.6270)    | 0.0001<br>(0.1223)       | -0.0003<br>(-0.6264)     |
| X12       | 0.0864**<br>(2.2771)    | 0.0987***<br>(2.7008)   | 0.0019**<br>(2.2782)     | 0.0022***<br>(2.7022)    |
| X13       | -0.0338<br>(-1.3608)    | -0.0164<br>(-0.6970)    | -3.6543<br>(-1.3610)     | -1.7760<br>(-0.6975)     |
| X14       | 0.1231<br>(1.2962)      | 0.0866<br>(1.1918)      | 27.0788<br>(1.2921)      | 19.0537<br>(1.1891)      |
| X15       | -0.0419<br>(-1.0392)    | -0.1020**<br>(-2.4140)  | -8.0761<br>(-1.0414)     | -19.6223**<br>(-2.4168)  |
| 2010.year |                         | 0.0199*<br>(1.7747)     |                          | 2.6952*<br>(1.7769)      |
| 2011.year |                         | 0.0434***<br>(3.5833)   |                          | 5.8726***<br>(3.5858)    |
| 2012.year |                         | 0.0623***<br>(4.6656)   |                          | 8.4282***<br>(4.6691)    |
| 2013.year |                         | 0.0871***<br>(5.2650)   |                          | 11.7909***<br>(5.2685)   |
| 2014.year |                         | 0.0962***               |                          | 13.0140***               |

|                            |            |           |             |             |
|----------------------------|------------|-----------|-------------|-------------|
|                            |            | (5.7126)  |             | (5.7154)    |
| 2015.year                  |            | 0.1142*** |             | 15.4510***  |
|                            |            | (6.4667)  |             | (6.4687)    |
| 2016.year                  |            | 0.1247*** |             | 16.8784***  |
|                            |            | (6.8119)  |             | (6.8131)    |
| Constant                   | -0.3173*** | -0.1138   | -93.2512*** | -56.2585*** |
|                            | (-2.7230)  | (-1.2085) | (-4.0189)   | (-2.8407)   |
| Spatial weights ( $\rho$ ) | 0.3211***  | 0.1752*** | 0.3210***   | 0.1751***   |
|                            | (5.6324)   | (2.8091)  | (5.6300)    | (2.8074)    |
| Adj $R^2$                  | 0.461      | 0.675     | 0.461       | 0.675       |

Notes: \*\*\*, \*\*, and \* mean the significance level of 0.001, 0.01, and 0.05, respectively; the values in parentheses are t values. N means the number of observations.
